# Supplementary material for: Specific proteolysis mediated by a p97-directed proteolysis-targeting chimera (p97-PROTAC)
Source: eLife journal article supplement (doi:10.7554/elife.101496), 2025-11-25
Supplement: supp [file Figure 1-figure supplement 1E-source data 2.pdf › Figure 1-figure supplement 1-source data 2/Figure 1-figure supplement 1E-source data 2.pdf]

Twenty micrograms of total protein from cells transfected with 0.5  $\mu$ g of Coilin-GFP and different concentrations of the PROTAC-p97 using the Nb87 (anti- $\alpha$ -synuclein, used here as a negative control) were loaded. Specifically, cells were transfected **with 2 or 4  $\mu$ g of p97-PROTAC-Nb87**, or with **4  $\mu$ g of an empty vector**.

The membrane incubated with **anti-GFP antibody** shows Coilin-GFP protein.

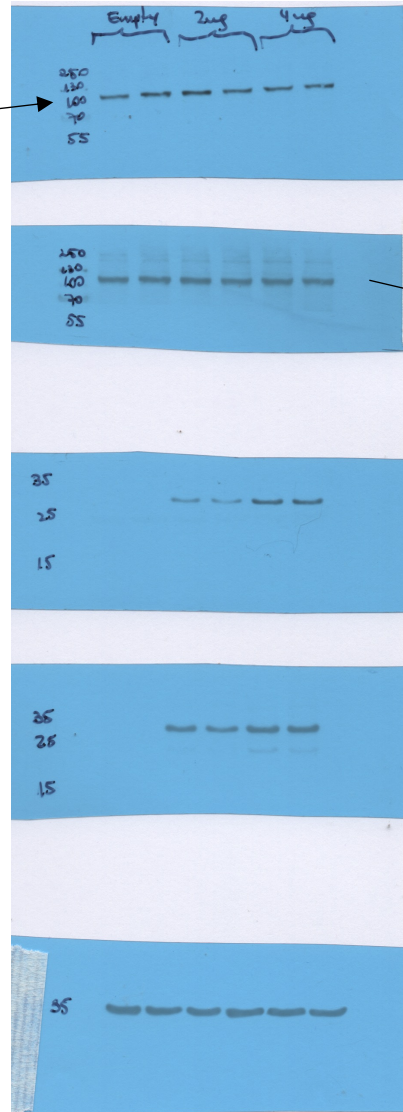

**anti-Myc tag antibody** to detect the **expression** of the degradation system **p97-PROTAC**.  
The bottom film was exposed for a longer duration.

The experiments were performed in duplicate using independent samples. The nitrocellulose membrane was cut at the 35 kDa marker to allow separate incubation of the lower part with **anti-GAPDH antibody**. This section was subsequently stripped and re-probed with **anti-Myc tag antibody** to detect the expression of the degradation system.

Same film of the membrane incubated with **anti-GFP antibody**, but with **longer exposure time**.

**GAPDH**
