# Supplementary material for: Specific proteolysis mediated by a p97-directed proteolysis-targeting chimera (p97-PROTAC)
Source: eLife journal article supplement (doi:10.7554/elife.101496), 2025-11-25
Supplement: supp [file Figure 1-figure supplement 1F-source data 2.pdf › Figure 1-figure supplement 1-source data 2/Figure 1-figure supplement 1F-source data 2.pdf]

Twenty micrograms of total protein from cells transfected with 0.5  $\mu\text{g}$  of **ETV1-GFP** and different concentrations of the PROTAC-p97 using Nb87 (anti- $\alpha$ -synuclein, used here as a **negative control**) were loaded. The experiments were performed in duplicate using independent samples.

The nitrocellulose membrane was cut to allow separate incubation with **anti-GFP (to detect ETV1-GFP)** and anti-Myc tag antibodies. After developing the signal for ETV1-GFP, the corresponding membrane section was stripped and re-probed with **anti-vinculin** as a loading control.

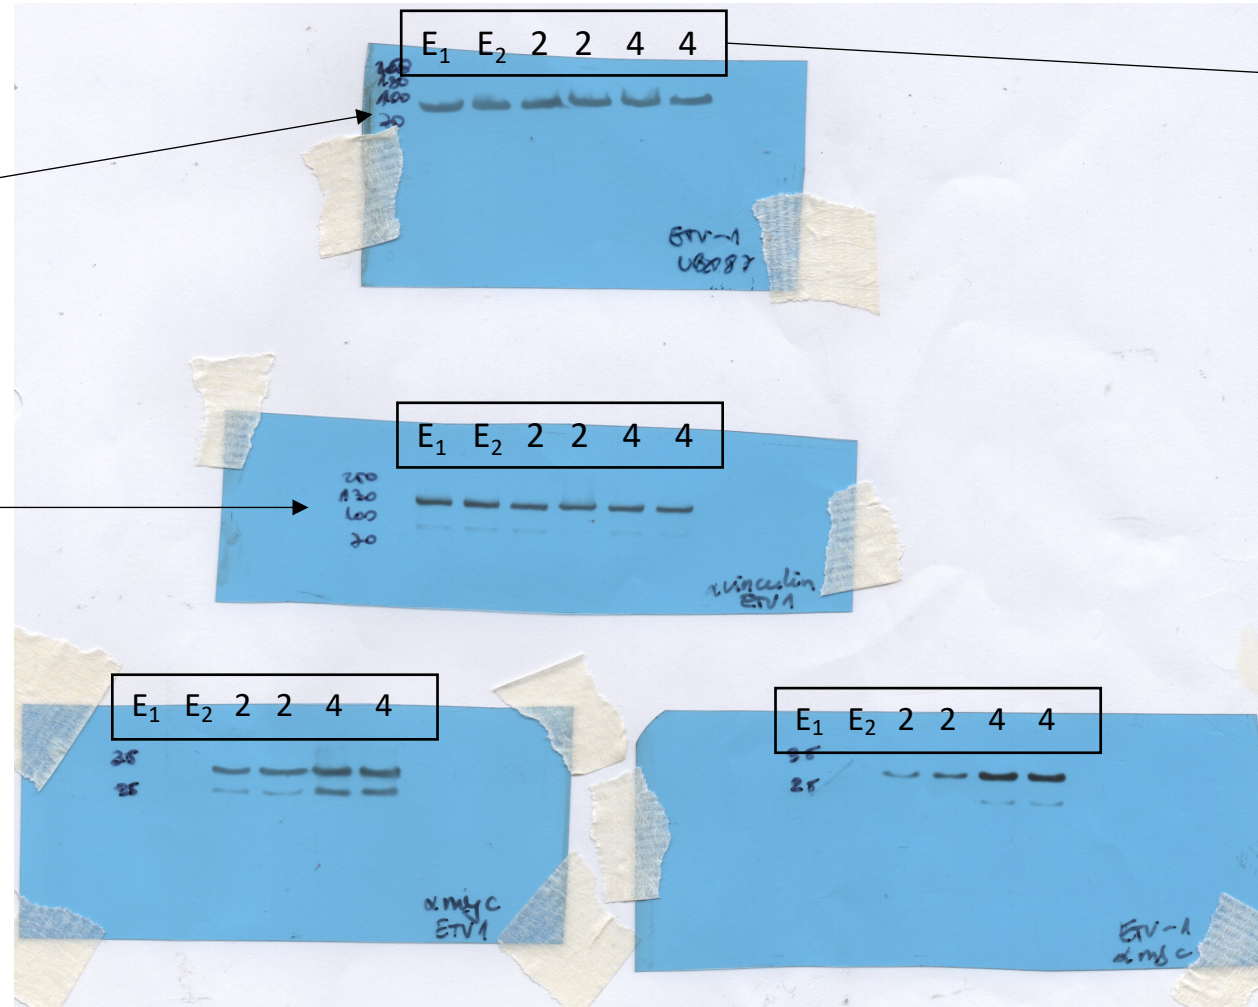

Cells were transfected with 2 or 4  $\mu\text{g}$  of p97-PROTAC-Nb87, or with 4  $\mu\text{g}$  of an empty vector (E).

Both films display expression of the degradation system (**anti-myc-tag**). The film on the left was acquired with a longer exposure time compared to the one on the right.
