# Supplementary material for: Specific proteolysis mediated by a p97-directed proteolysis-targeting chimera (p97-PROTAC)
Source: eLife journal article supplement (doi:10.7554/elife.101496), 2025-11-25

Twenty micrograms of total protein from cells transfected with 0.5  $\mu$ g of Emerin-GFP and different concentrations of the PROTAC-p97 using the Nb87 (anti- $\alpha$ -synuclein, used here as a negative control) were loaded. Specifically, cells were transfected with 2 or 4  $\mu$ g of **p97-PROTAC-Nb87**, or with **4  $\mu$ g of an Empty vector**. The experiments were performed in duplicate using independent samples

The same membrane was used; two films are shown corresponding to different exposure times.

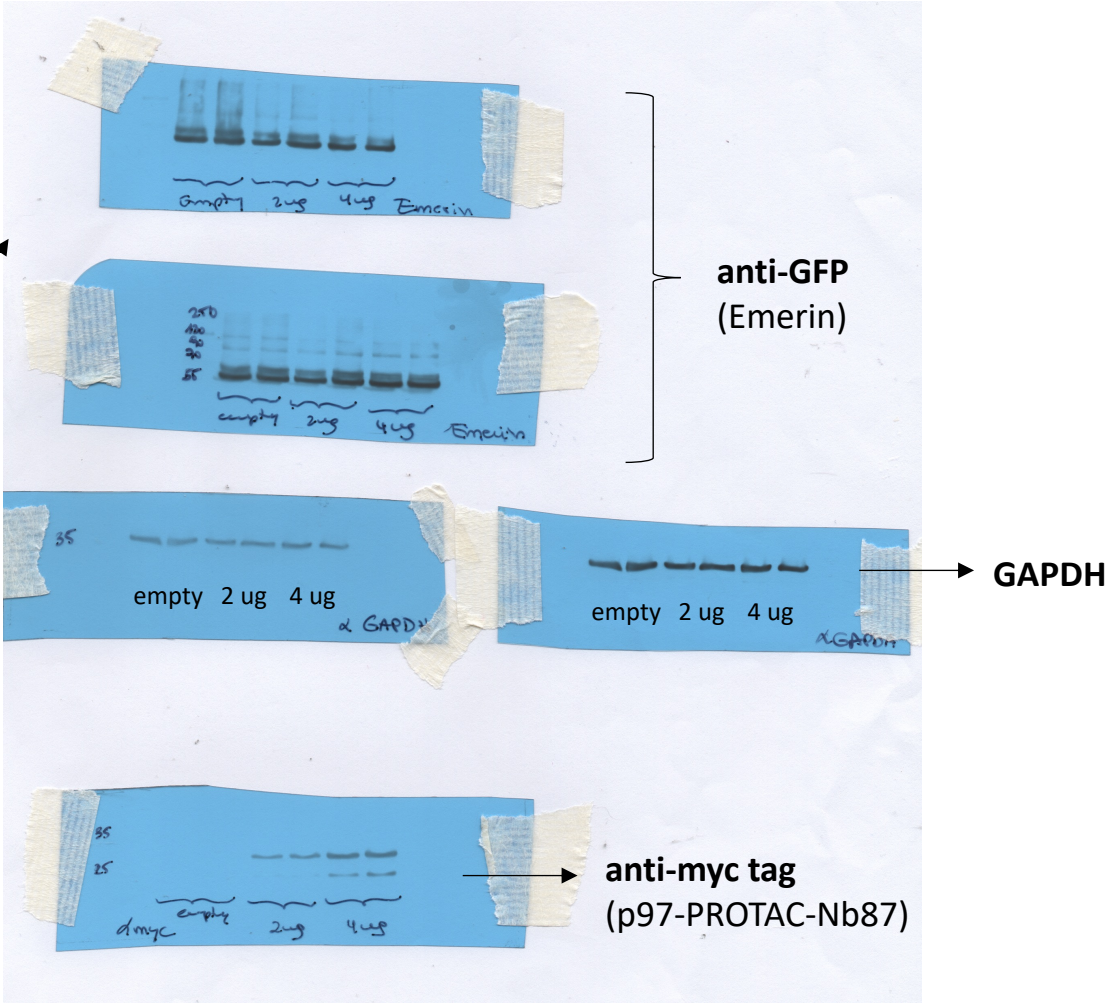

Supplement: supp [file Figure 1-figure supplement 1G-source data 2.pdf › Figure 1-figure supplement 1-source data 2/Figure 1-figure supplement 1G-source data 2.pdf]
