# Supplementary material for: Specific proteolysis mediated by a p97-directed proteolysis-targeting chimera (p97-PROTAC)
Source: eLife journal article supplement (doi:10.7554/elife.101496), 2025-11-25

Twenty micrograms of total protein from cells co-transfected with 0.5  $\mu$ g of Coilin-GFP and different concentrations of the PROTAC-p97 (2 and 4  $\mu$ g), or 4  $\mu$ g of an empty vector, were loaded.

The experiment was performed in duplicate using independent samples. The nitrocellulose membrane was cut at the 35 kDa marker to allow separate incubation of the lower part with **anti-GAPDH antibody**. This section was subsequently stripped and re-probed with anti-Myc tag antibody to detect the expression of the degradation system

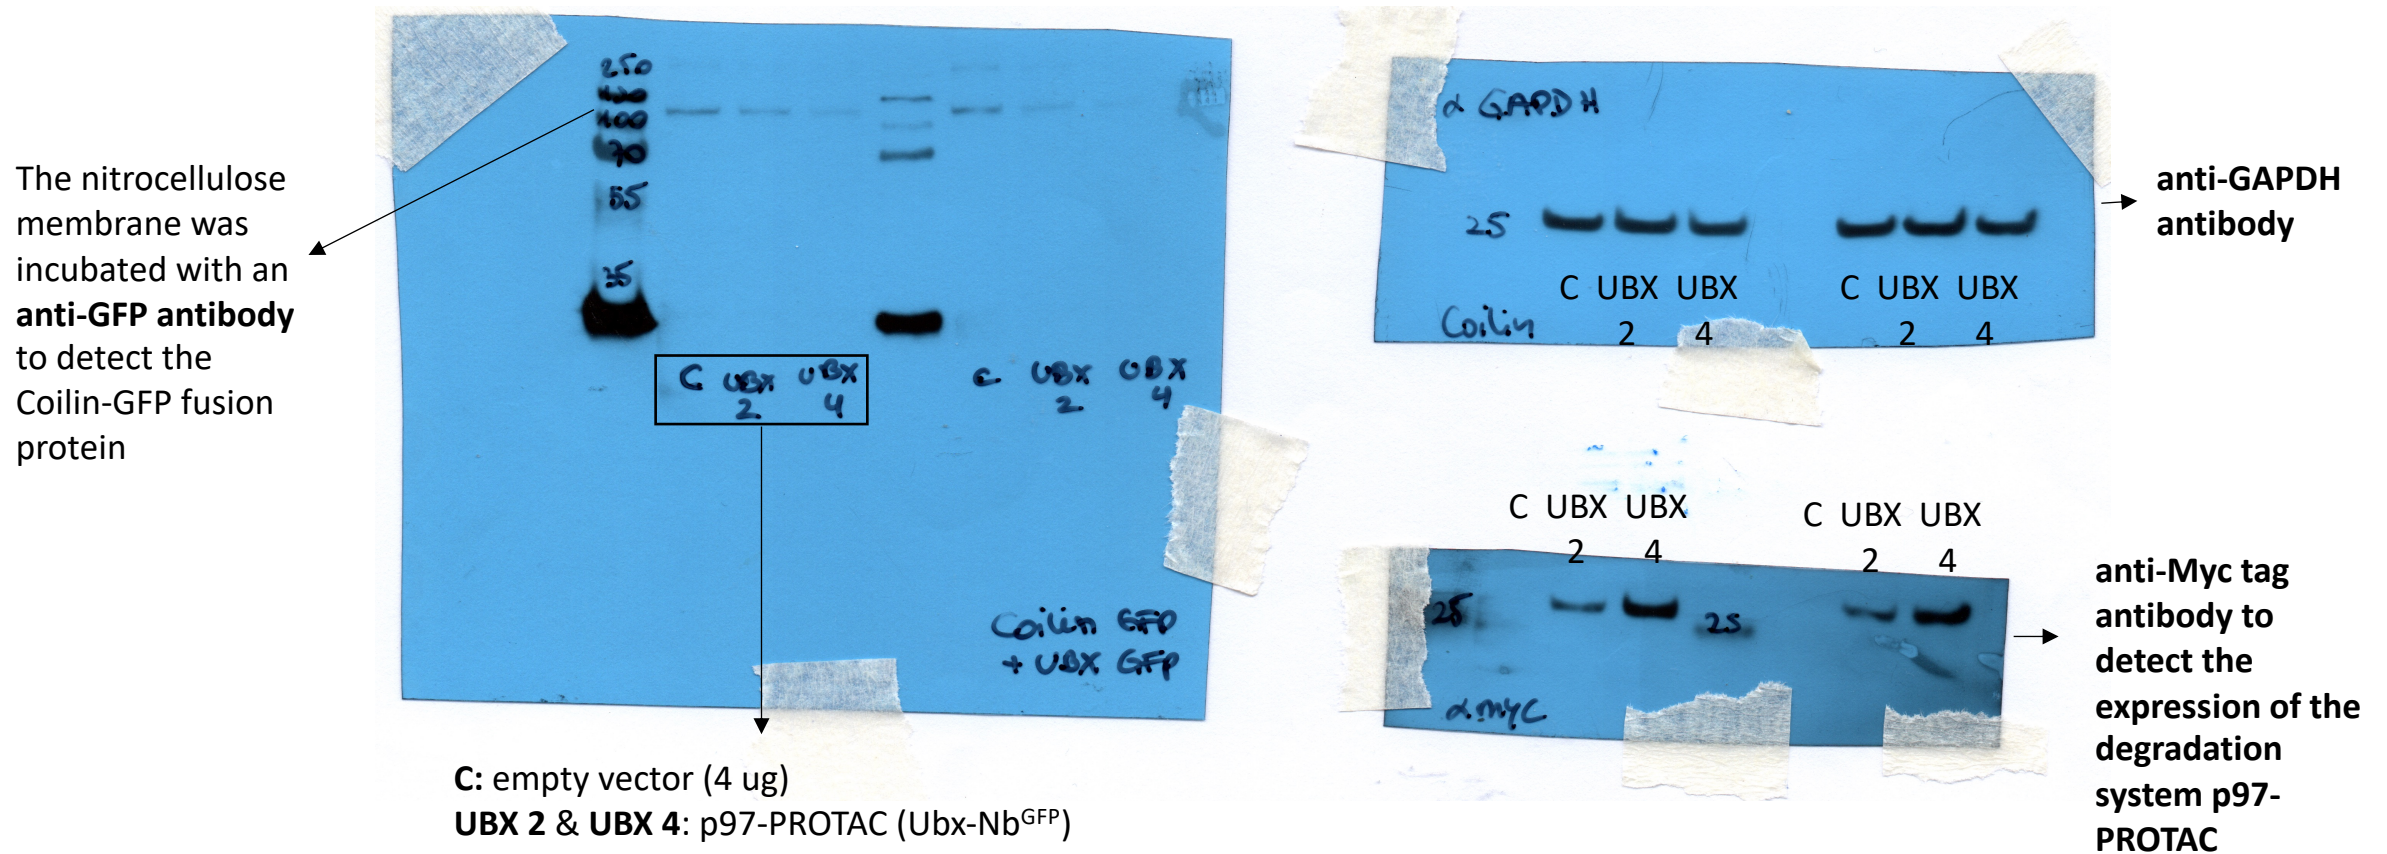

Supplement: supp [file Figure 1C-source data 2.pdf › Figure 1-source data 2/Figure 1C-source data 2.pdf]
