# Supplementary material for: Specific proteolysis mediated by a p97-directed proteolysis-targeting chimera (p97-PROTAC)
Source: eLife journal article supplement (doi:10.7554/elife.101496), 2025-11-25

Twenty micrograms of total protein from cells co-transfected with 0.5  $\mu$ g of Emerin-GFP and different concentrations of the PROTAC-p97 (2 and 4  $\mu$ g), or 4  $\mu$ g of an empty vector (C), were loaded.

The experiment was performed in duplicate using independent samples. After incubation with anti-GFP antibody to detect the Emerin-GFP protein, the nitrocellulose membrane was cut at the 35 kDa marker. The lower portion was stripped and incubated with anti-GAPDH antibody. To assess the expression of the degradation system, the same membrane was stripped again and re-incubated with an anti-Myc tag antibody.

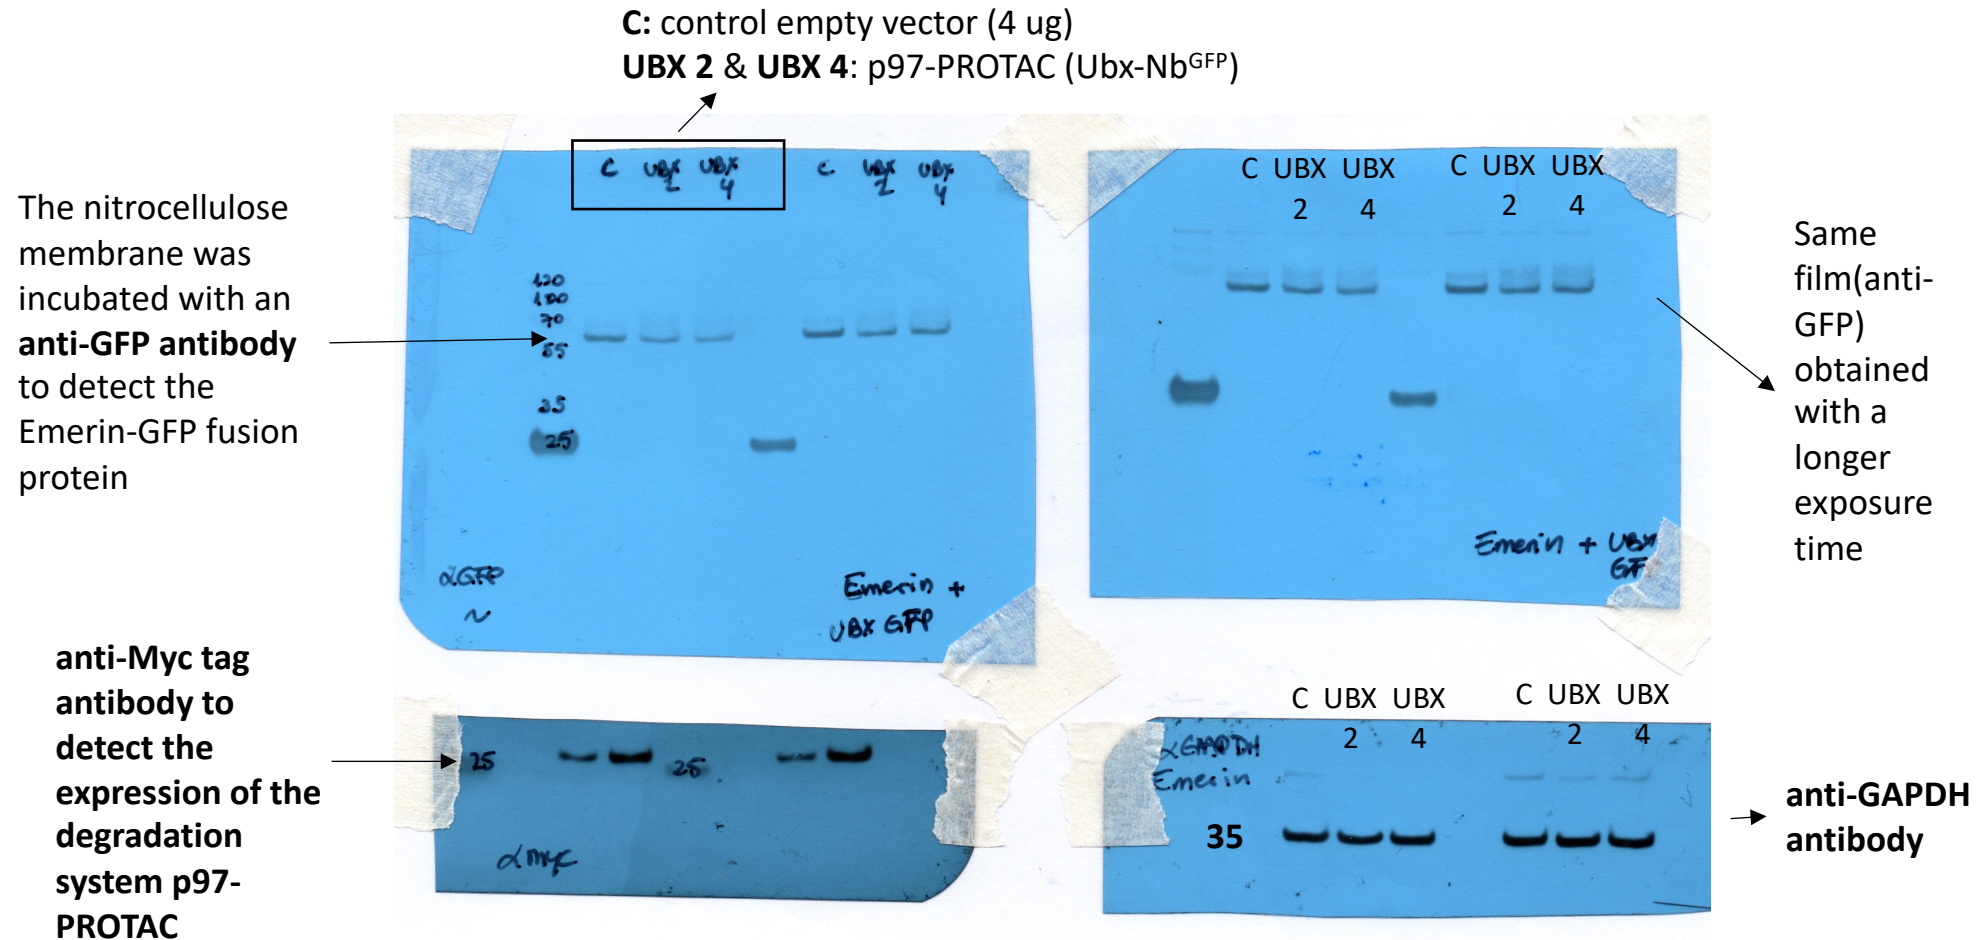

Supplement: supp [file Figure 1Esource data 2.pdf › Figure 1-source data 2/Figure 1Esource data 2.pdf]
