# Supplementary material for: Specific proteolysis mediated by a p97-directed proteolysis-targeting chimera (p97-PROTAC)
Source: eLife journal article supplement (doi:10.7554/elife.101496), 2025-11-25
Supplement: supp [file Figure 1G-source data 2.pdf › Figure 1-source data 2/Figure 1G-source data 2.pdf]

Twenty micrograms of total protein from cells co-transfected with 0.5  $\mu$ g of ETV-GFP and different concentrations of the PROTAC-p97 (2 and 4  $\mu$ g), or 4  $\mu$ g of an empty vector (C), were loaded.

The experiment was performed in duplicate using independent samples. After incubation with anti-GFP antibody to detect the ETV1-GFP protein, the nitrocellulose membrane was cut at the 35 kDa marker. The lower portion was stripped and incubated with anti-GAPDH antibody. To assess the expression of the degradation system, the same membrane was stripped again and re-incubated with an anti-Myc tag antibody.

The nitrocellulose membrane was incubated with an **anti-GFP antibody** to detect the ETV1-GFP fusion protein

**C:** control empty vector (4  $\mu$ g)  
**UBX 2 & UBX 4:** p97-PROTAC (Ubx-Nb<sup>GFP</sup>)

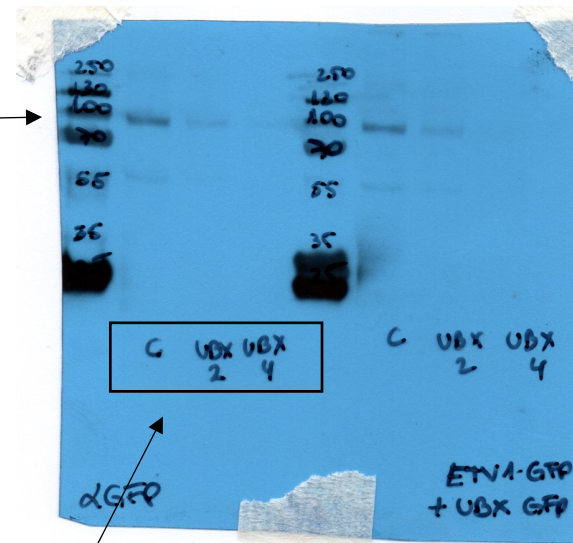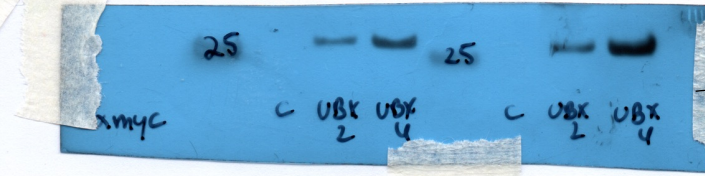

**anti-Myc tag antibody** to detect the expression of the degradation system p97-PROTAC

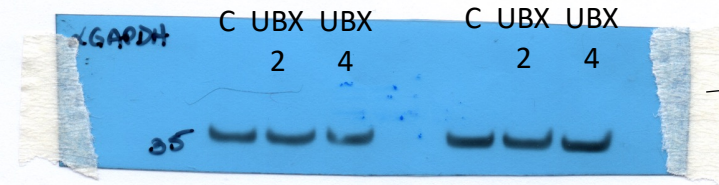

**anti-GAPDH**

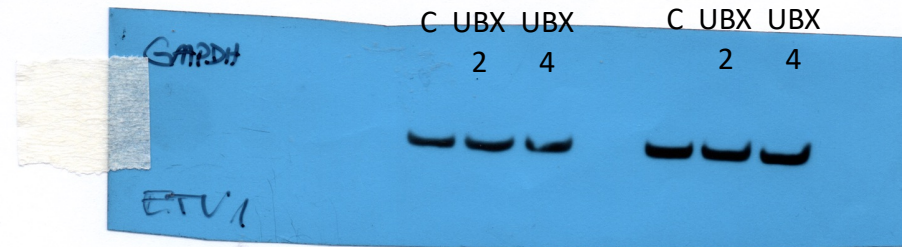

Same film (anti-GAPDH) obtained with a longer exposure time
