# Supplementary material for: Specific proteolysis mediated by a p97-directed proteolysis-targeting chimera (p97-PROTAC)
Source: eLife journal article supplement (doi:10.7554/elife.101496), 2025-11-25
Supplement: supp [file Figure 2F-source data 2.pdf › Figure 2-source data 2/Figure 2F-source data 2.pdf]

Forty micrograms of total protein from TP53BP1-YFP knock-in (KI) cells transfected with 4  $\mu$ g of the PROTAC-p97 Nb-GFP construct or 4  $\mu$ g of an empty vector were loaded onto a 4–10% gradient polyacrylamide gel. Only the samples loaded with 40  $\mu$ g of total protein are shown in the manuscript. This experiment was performed in triplicate using independent samples.

C: control empty vector (4  $\mu$ g DNA)  
U: p97-PROTAC (Ubx-Nb<sup>GFP</sup>) (4  $\mu$ g DNA)

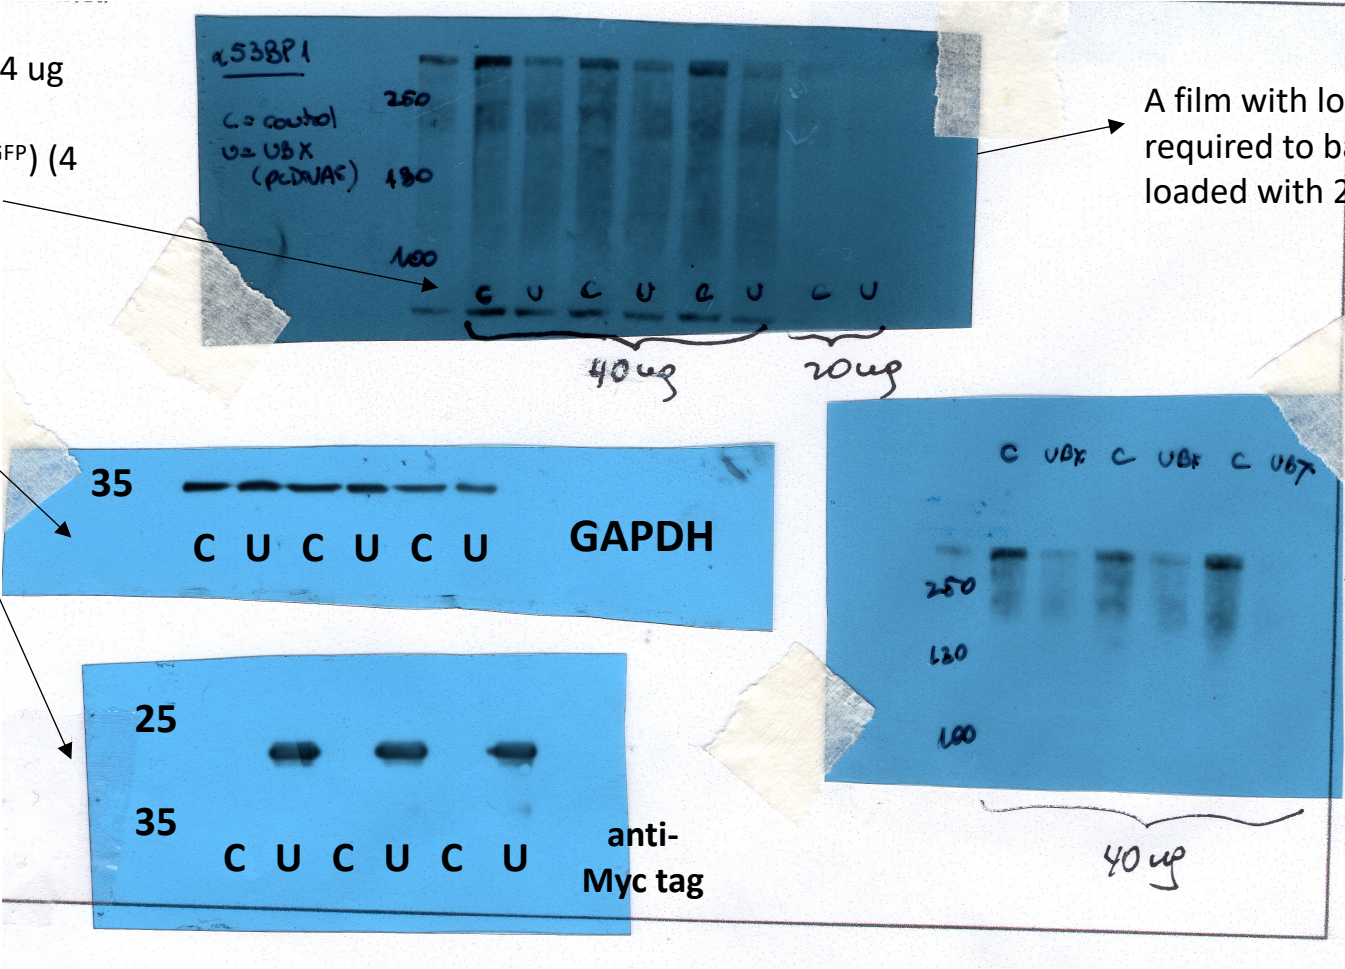

A film with longer exposure time was required to barely detect the samples loaded with 20  $\mu$ g of total protein.

The membrane incubated with **anti-GFP antibody** shows 53BP1-YFP protein only in the samples where 40  $\mu$ g of total protein were loaded.

anti-Myc tag antibody to detect the expression of the degradation system p97-PROTAC
