# Supplementary material for: Specific proteolysis mediated by a p97-directed proteolysis-targeting chimera (p97-PROTAC)
Source: eLife journal article supplement (doi:10.7554/elife.101496), 2025-11-25

HeLa cells were co-transfected with **0.5  $\mu\text{g}$  of the Nb<sup>GFP</sup>-Myc-tag** vector and either **2  $\mu\text{g}$  or 4  $\mu\text{g}$  of the VCP/p97-GFP vector**, or an **empty vector (control)**. Fifteen micrograms of total protein were loaded. The experiment was performed in duplicate using independent biological samples.

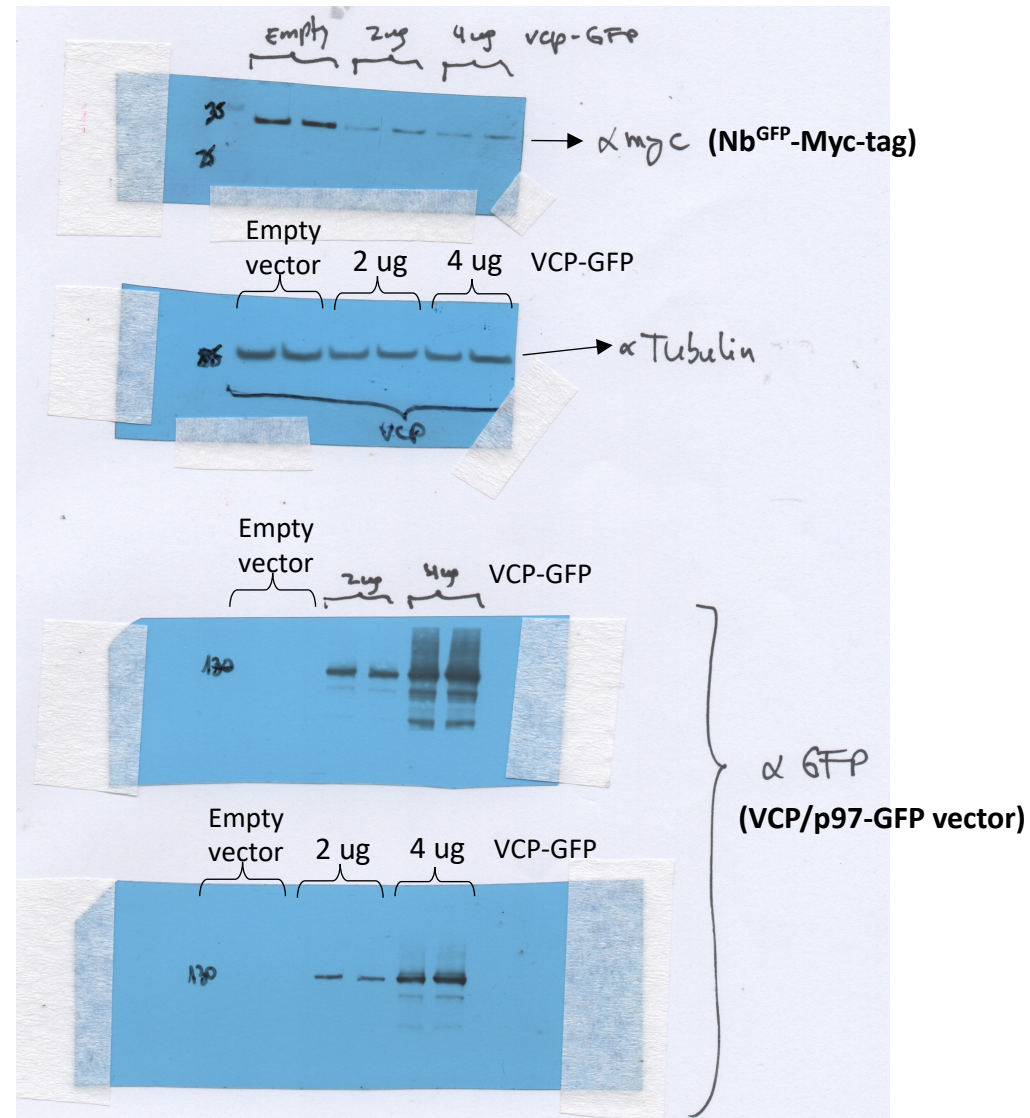

Supplement: supp [file Figure 4-figure supplement 1A-source data 2.pdf › Figure 4-figure supplement 1-source data 2/Figure 4-figure supplement 1A-source data 2.pdf]
