# Supplementary material for: Specific proteolysis mediated by a p97-directed proteolysis-targeting chimera (p97-PROTAC)
Source: eLife journal article supplement (doi:10.7554/elife.101496), 2025-11-25

Two gels were run, each loaded with 20  $\mu$ g of total protein from wild-type HeLa cells treated for 4 hours with PYR-41 or DMSO (negative control). One gel was subsequently used for ubiquitin detection, and the other for p53 detection. Subsequently, the membranes were stripped and used to detect loading controls: GAPDH on the membrane previously used for p53 detection, and tubulin on the membrane used for ubiquitin detection.

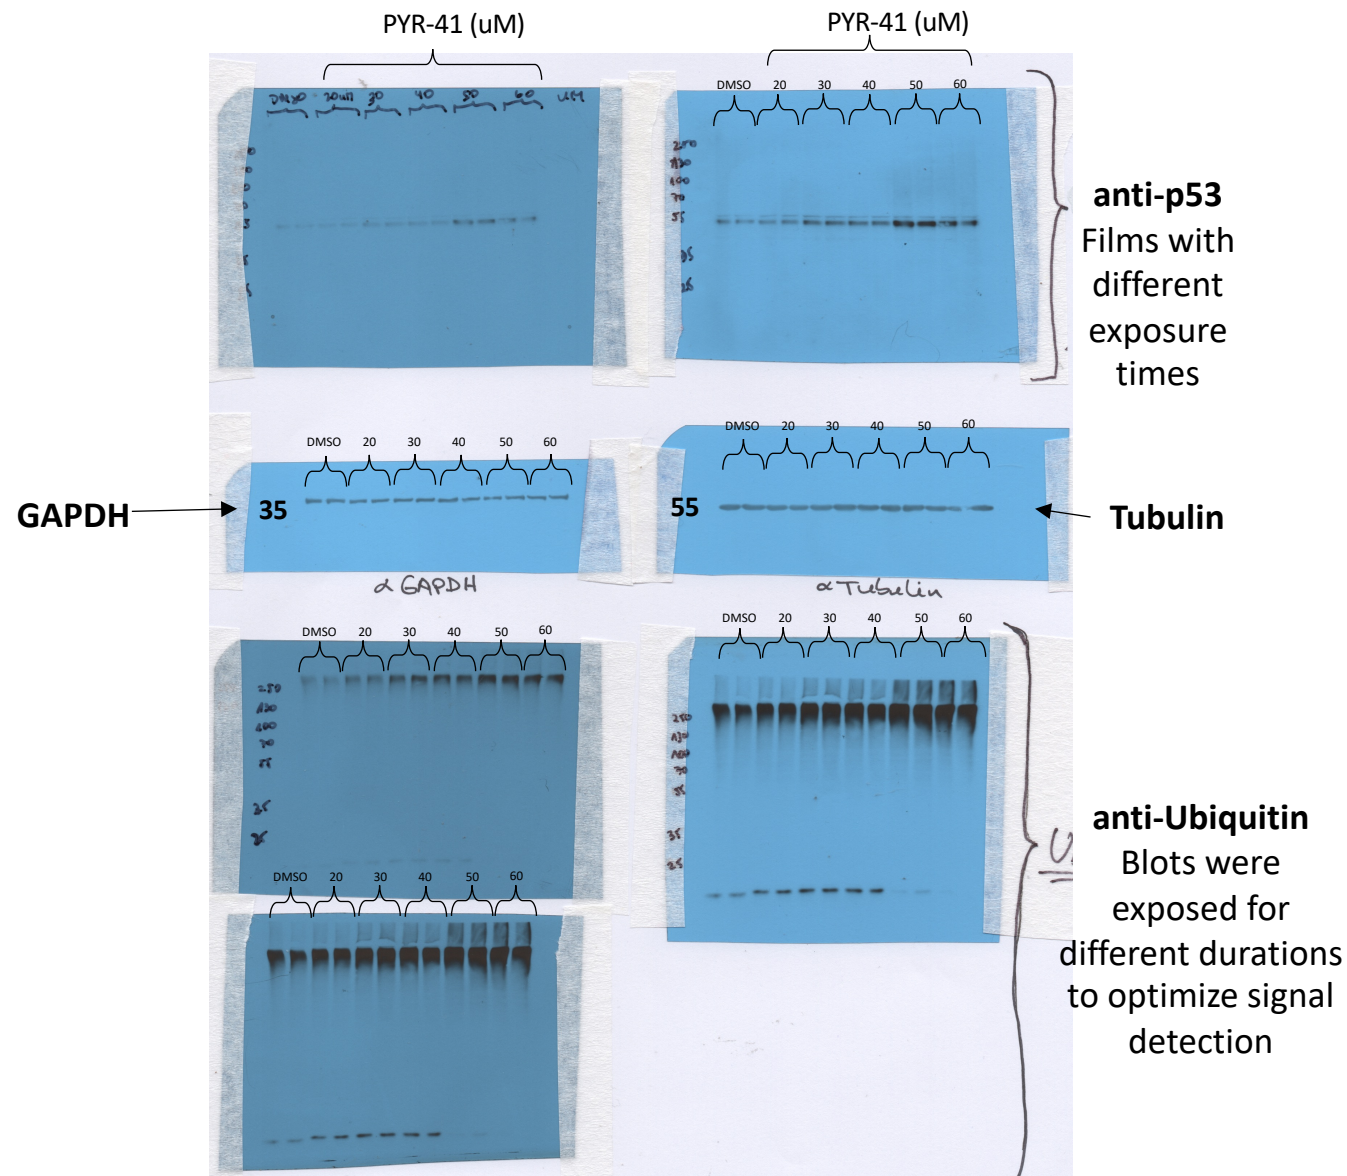

Supplement: supp [file Figure 4-figure supplement 1C-source data 2.pdf › Figure 4-figure supplement 1-source data 2/Figure 4-figure supplement 1C-source data 2.pdf]
