# Supplementary material for: Specific proteolysis mediated by a p97-directed proteolysis-targeting chimera (p97-PROTAC)
Source: eLife journal article supplement (doi:10.7554/elife.101496), 2025-11-25

Twenty micrograms of total protein from cells transfected with 0.5  $\mu\text{g}$  of GFP protein and different concentrations of the PROTAC-p97-Nb<sup>GFP</sup> (2 and 4  $\mu\text{g}$ ), or 4  $\mu\text{g}$  of an empty vector, were loaded. Two polyacrylamide gels were loaded with 20  $\mu\text{g}$  of total protein; both gels were loaded with identical samples. One gel was used for detection with **anti-GFP antibody**, and after stripping, it was re-probed with **anti-Myc tag antibody**. The second gel was used for **GAPDH detection** and, after stripping, was re-probed with anti-GFP to confirm equal protein loading across gels. The experiments were performed in triplicate using independent samples

C = control (empty vector)  
 U = p97-PROTAC (Ubx-Nb<sup>GFP</sup>)

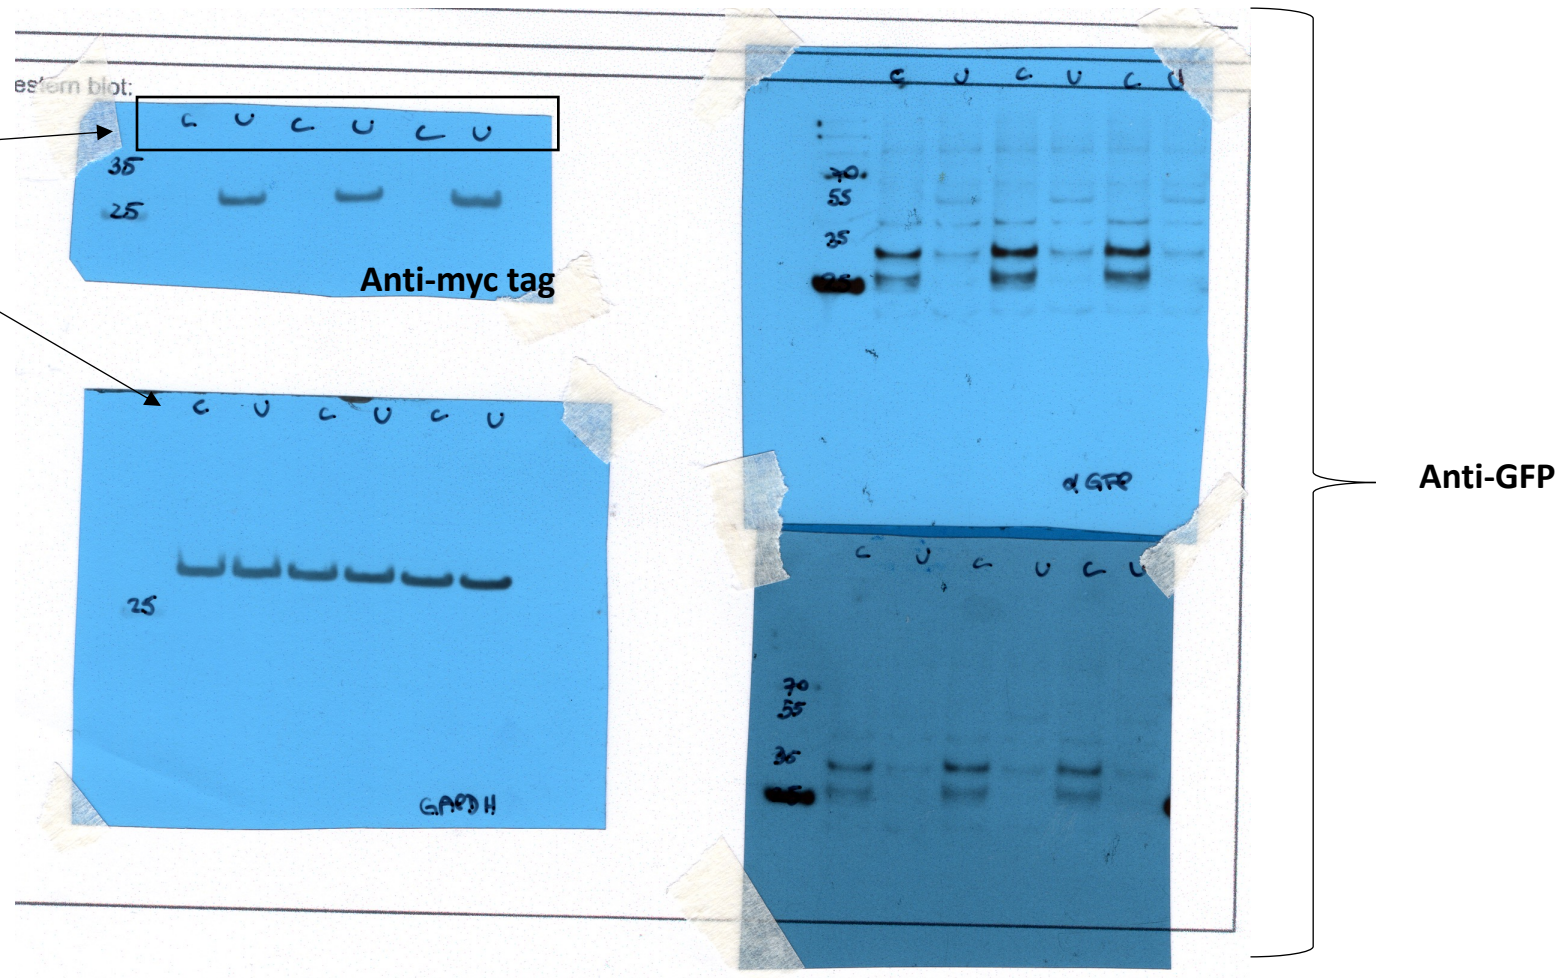

Supplement: supp [file Figure 4C-source data 2.pdf › Figure 4-source data 2/Figure 4C-source data 2.pdf]
