# Supplementary material for: Specific proteolysis mediated by a p97-directed proteolysis-targeting chimera (p97-PROTAC)
Source: eLife journal article supplement (doi:10.7554/elife.101496), 2025-11-25

Twenty micrograms of total protein from cells co-transfected with 1 µg of a **vector expressing GFP** and 3 µg of the **p97-PROTAC-Ubx-Nb<sup>GFP</sup> construct (U)**, or 3 µg of an **empty vector (C: control)**, were loaded. The following day, cells were treated with the indicated inhibitors for 4 hours, using DMSO as a control. The experiments were performed in duplicate using independent samples

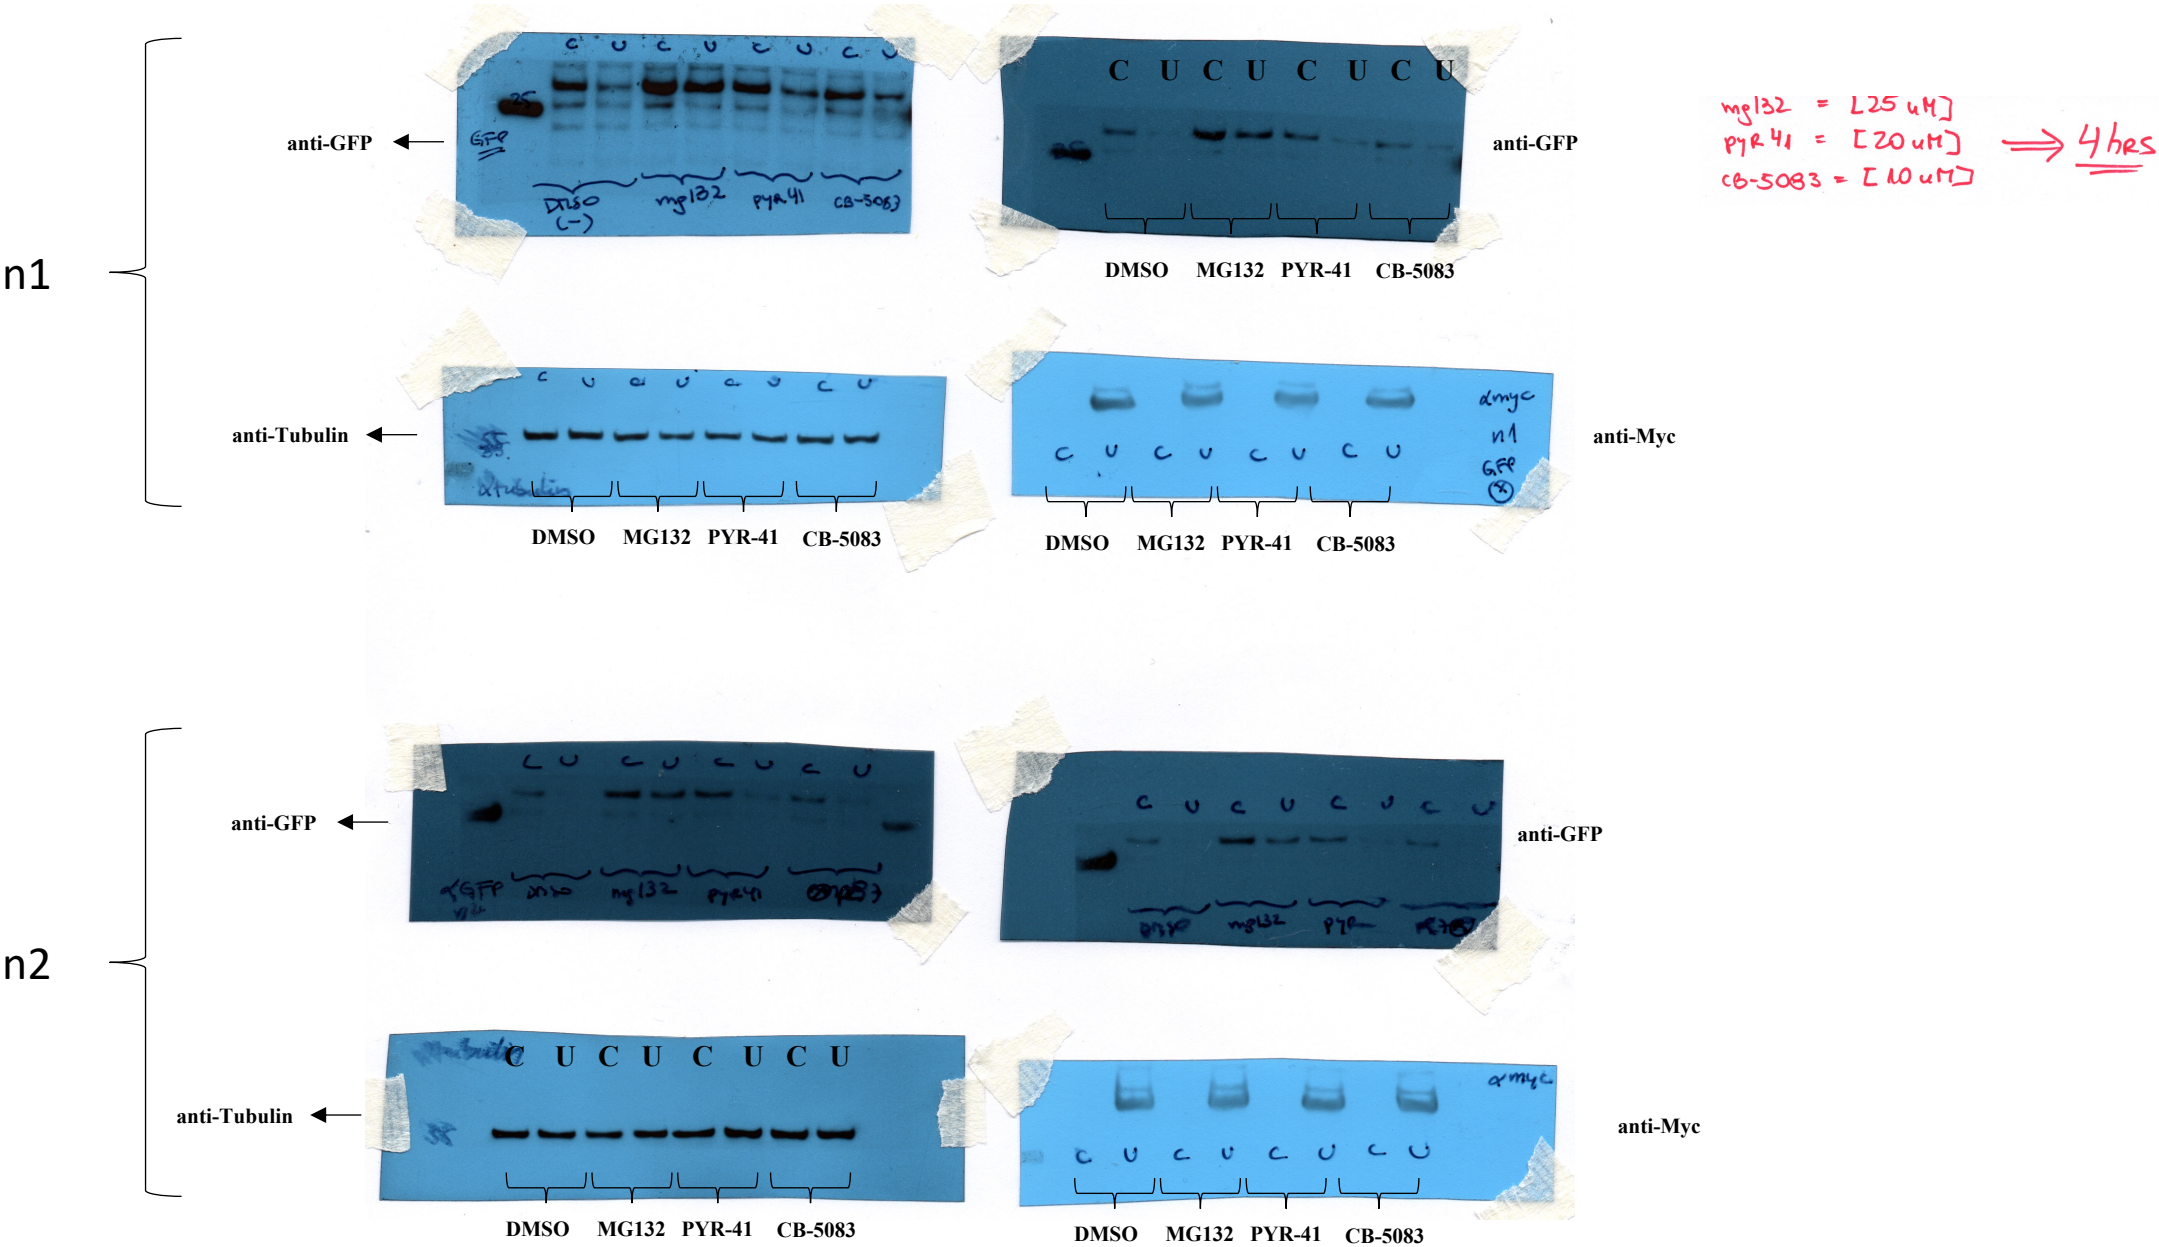

Supplement: supp [file Figure 4E-source data 2.pdf › Figure 4-source data 2/Figure 4E-source data 2.pdf]
