# Supplementary material for: Specific proteolysis mediated by a p97-directed proteolysis-targeting chimera (p97-PROTAC)
Source: eLife journal article supplement (doi:10.7554/elife.101496), 2025-11-25

On the first day, HeLa cells were transfected with siRNAs targeting either VCP or a non-targeting control. On the following day, the same cells were co-transfected with a vector encoding the Emerin-GFP fusion protein (0.5  $\mu$ g) and either the PROTAC construct expressing the Ubx-NbGFP domain (4  $\mu$ g) or an empty vector (4  $\mu$ g). After 24 hours, total protein was extracted from each well and the samples were analyzed by polyacrylamide gel electrophoresis. Each experiment was performed in triplicate using independent samples.

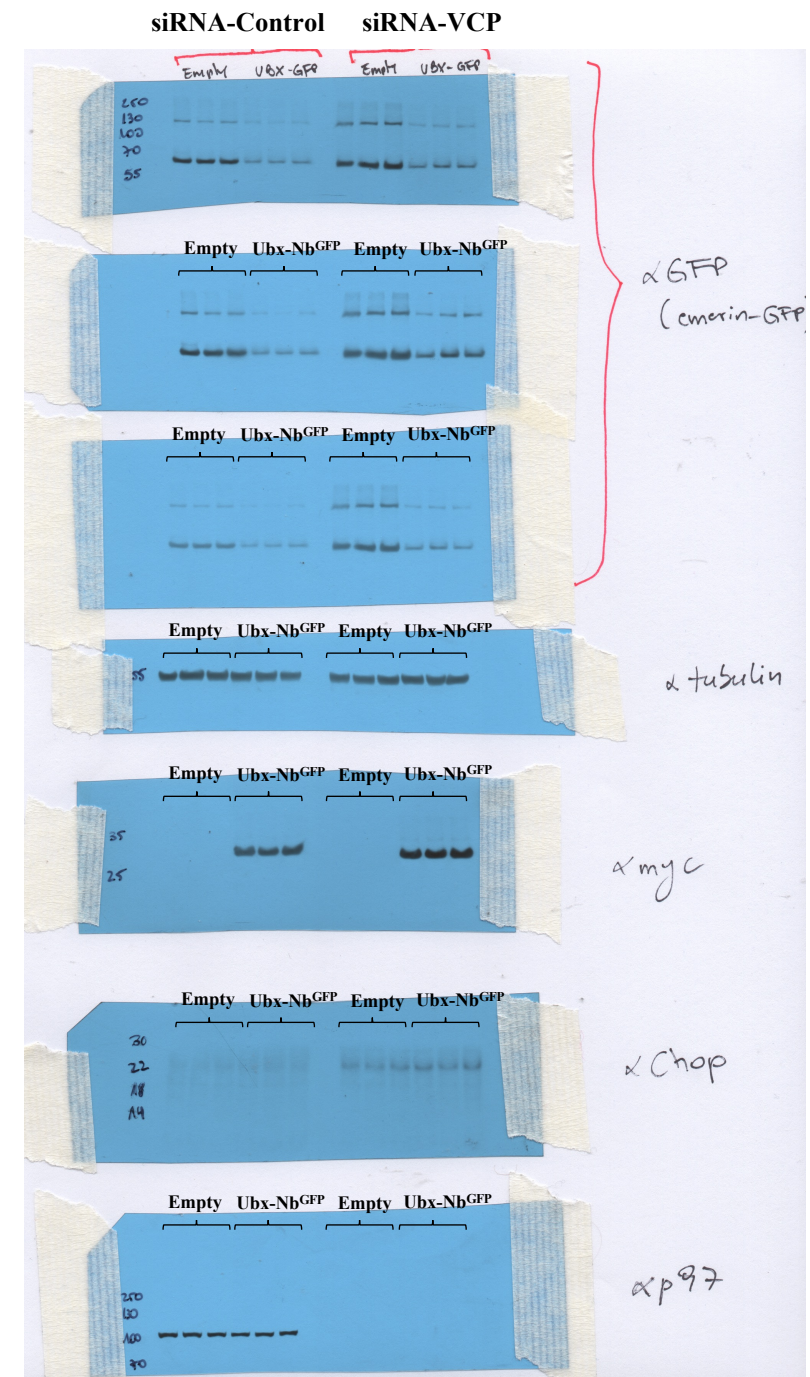

Supplement: supp [file Figure 4G-source data 2.pdf › Figure 4-source data 2/Figure 4G-source data 2.pdf]
