# Supplementary material for: Specific proteolysis mediated by a p97-directed proteolysis-targeting chimera (p97-PROTAC)
Source: eLife journal article supplement (doi:10.7554/elife.101496), 2025-11-25

HeLa cells were co-transfected with a vector encoding the Emerin-GFP fusion protein (0.5  $\mu$ g) and either the PROTAC construct expressing the Ubx-Nb<sup>GFP</sup> (UBX<sup>GFP</sup>) (4  $\mu$ g) or an empty vector (4  $\mu$ g). The day after transfection, cells were treated with the inhibitor PYR-41, using DMSO as a control. In experiments 2 and 3, cells were treated with 50  $\mu$ M PYR-41 for 4 hours; in experiment 1, the same concentration was used but the treatment lasted 3 hours. Each experiment was performed in triplicate using independent samples.

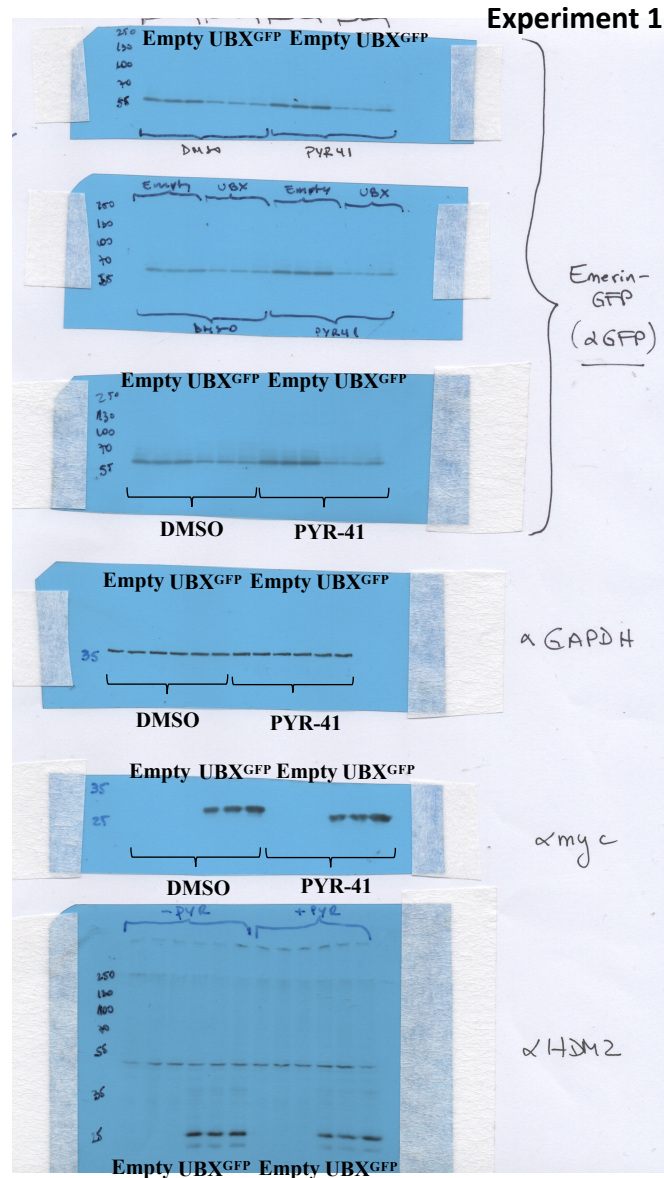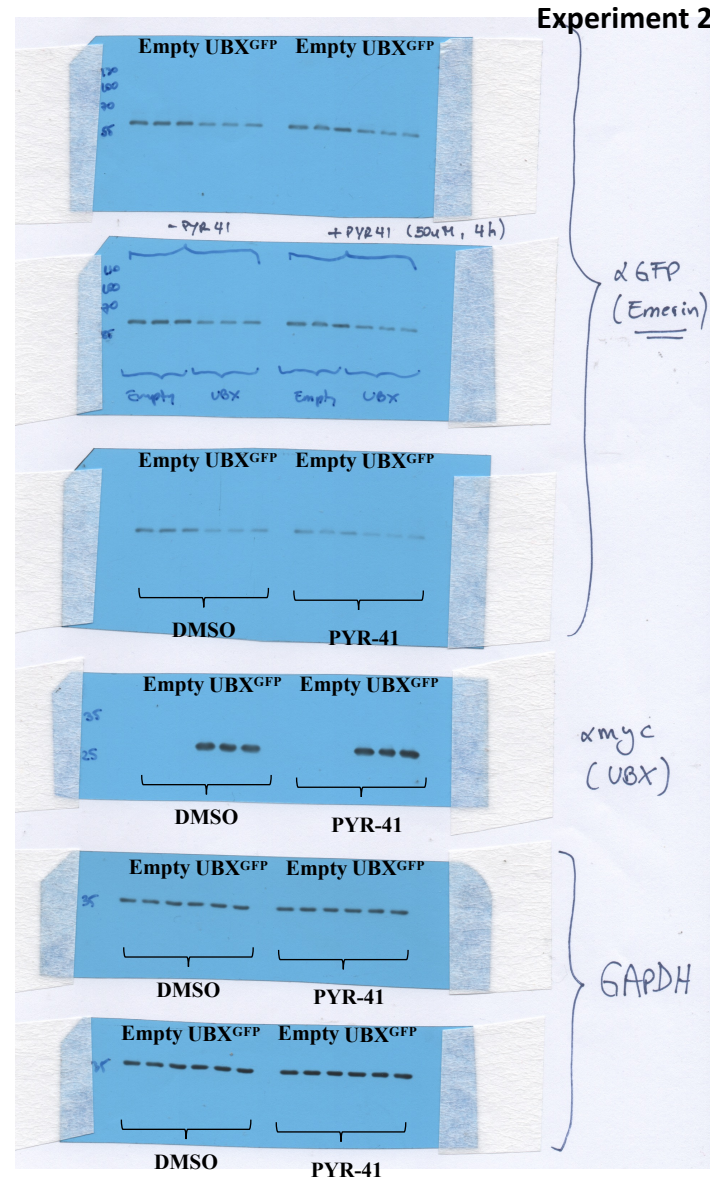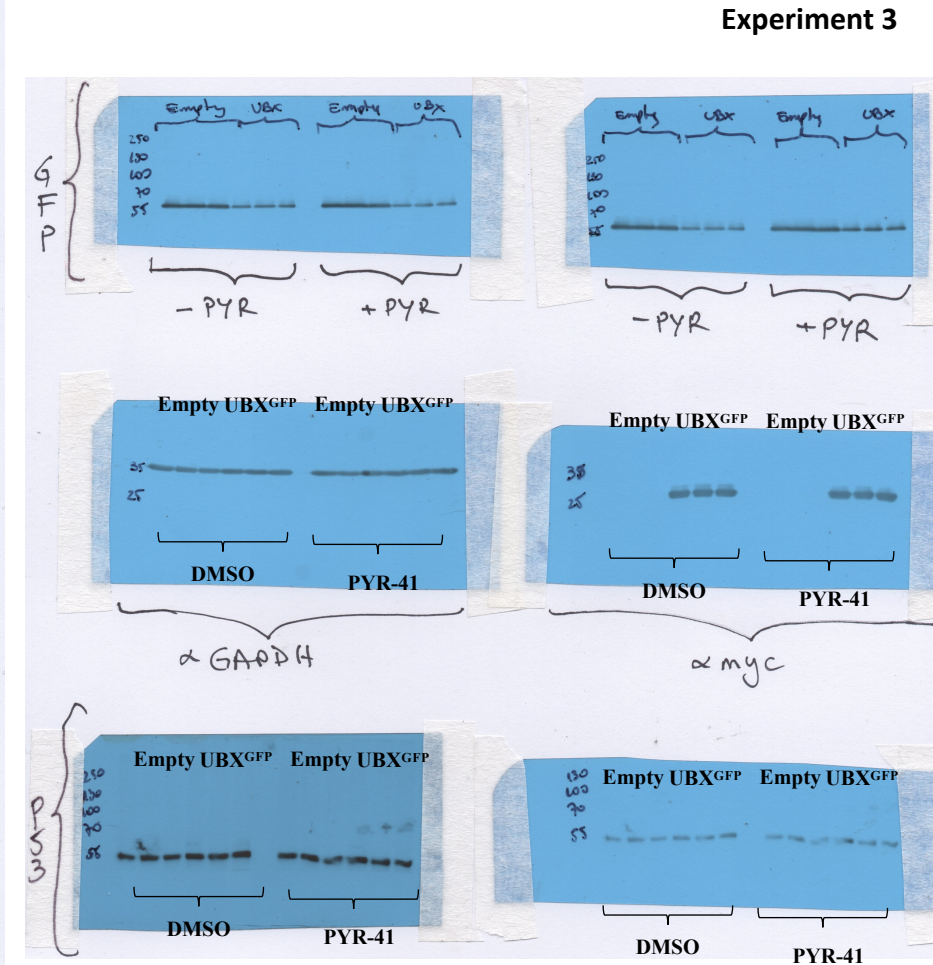

Supplement: supp [file Figure 4J-source data 2.pdf › Figure 4-source data 2/Figure 4J-source data 2.pdf]
