# Supplementary material for: Specific proteolysis mediated by a p97-directed proteolysis-targeting chimera (p97-PROTAC)
Source: eLife journal article supplement (doi:10.7554/elife.101496), 2025-11-25

HeLa cells were co-transfected with **Emerin-GFP** (0.5  $\mu$ g) and either an **empty vector (E)** or the **p97-PROTAC** construct (**Ubx-Nb<sup>GFP</sup>**, referred to as **U**). The day after transfection, cells were treated for 6 hours with the p97 inhibitor CB-5083 at 4 or 20  $\mu$ M, or with DMSO as a negative control.

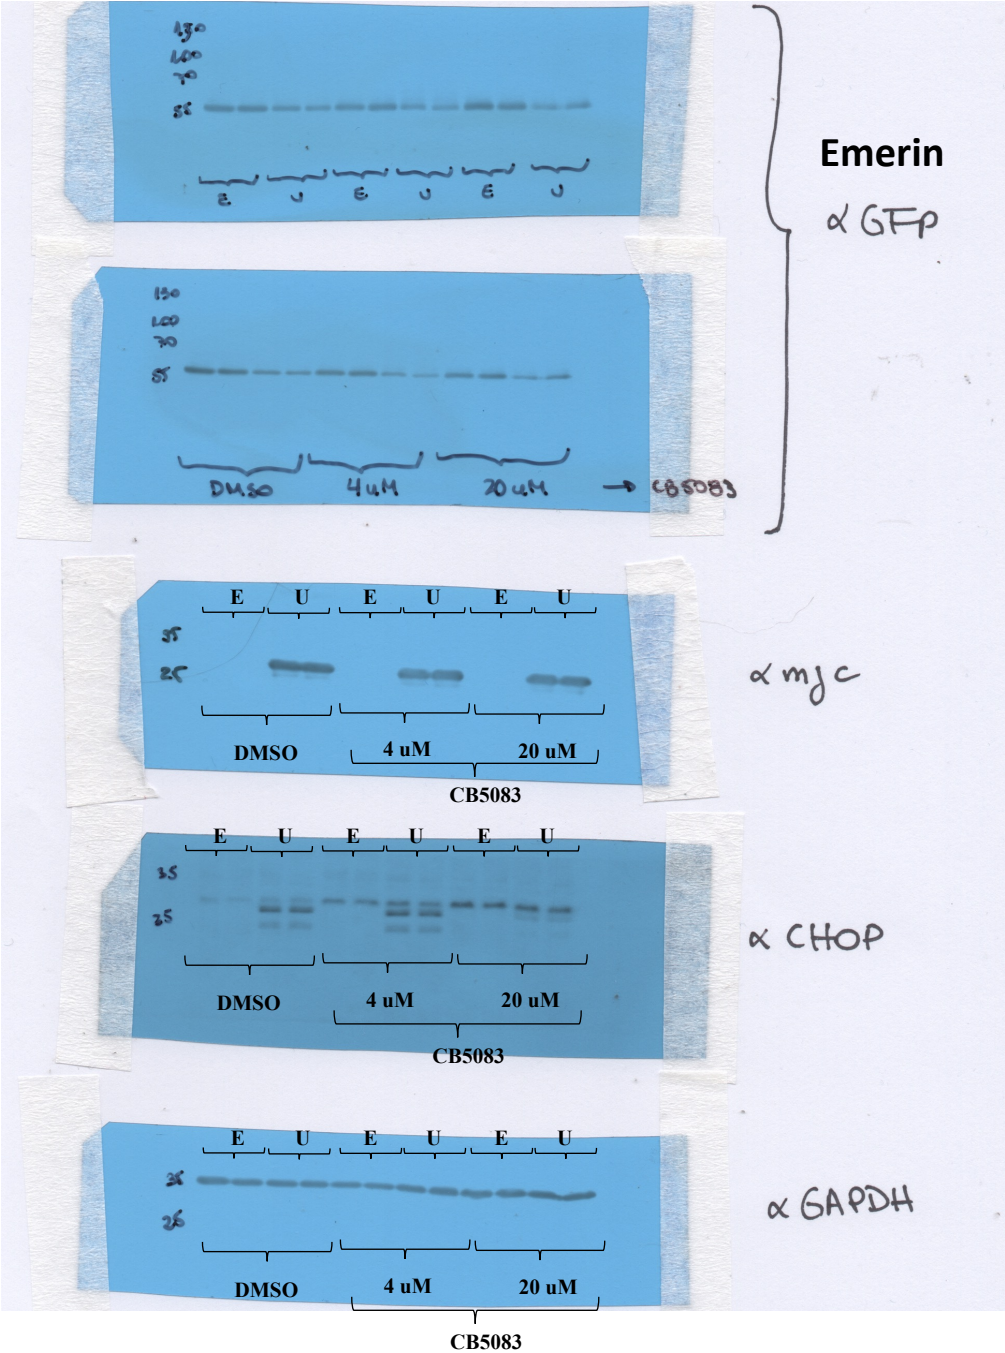

Supplement: supp [file Figure 4L-source data 2.pdf › Figure 4-source data 2/Figure 4L-source data 2.pdf]
