# Supplementary material for: Specific proteolysis mediated by a p97-directed proteolysis-targeting chimera (p97-PROTAC)
Source: eLife journal article supplement (doi:10.7554/elife.101496), 2025-11-25

HeLa cells were transfected with siRNAs targeting either **VCP (siRNA p97)** or a **non-targeting control (siRNA control)**. On the following day, cells were co-transfected with a vector expressing the **Huntingtin Q24-GFP** fusion protein, together with either an **empty vector** or the **p97-PROTAC-Ubx-Nb<sup>GFP</sup> construct**. The membrane incubated with anti-GFP antibody was developed at **different exposure times**, resulting in multiple films; this approach was used to allow **detection of protein aggregates**. The membrane incubated with **anti-Myc antibody** shows **expression of the degradation system**, which is increased upon VCP/p97 knockdown with siRNA.

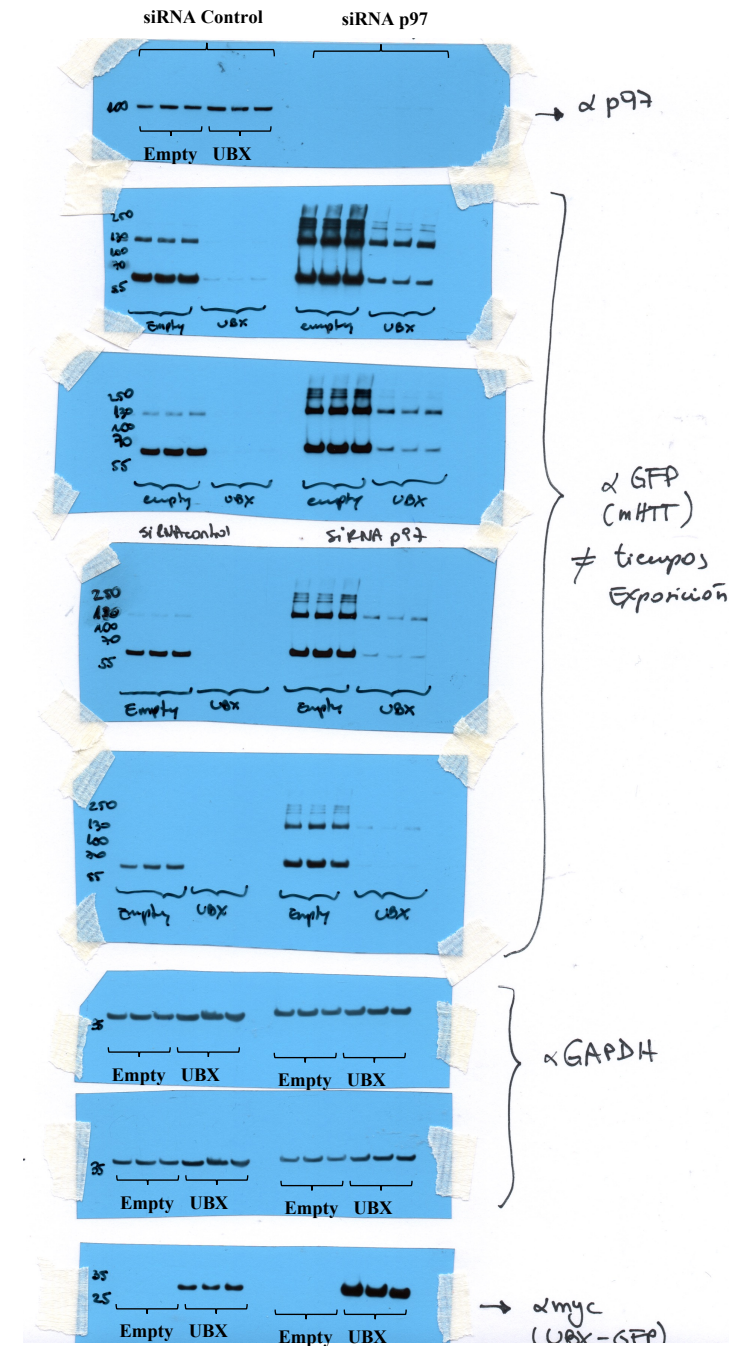

Supplement: supp [file Figure 5-figure supplement 3-source data 2.pdf › Figure 5-figure supplement 1-data 2/Figure 5-figure supplement 3-source data 2.pdf]
