# Supplementary material for: Specific proteolysis mediated by a p97-directed proteolysis-targeting chimera (p97-PROTAC)
Source: eLife journal article supplement (doi:10.7554/elife.101496), 2025-11-25

HeLa cells were co-transfected with **Q23-GFP (0.5  $\mu$ g DNA)** and either an **empty vector (E)** or the **p97-PROTAC-Ubx-Nb<sup>GFP</sup> construct (2 or 4  $\mu$ g DNA)**. The nitrocellulose membrane was cut at the 70 kDa marker to allow separate incubation: one part with **anti-GFP antibody to detect Q23-GFP** expression, and the other with anti-vinculin as a loading control. Subsequently, the membrane previously incubated with anti-GFP was stripped and re-probed with anti-Myc tag antibody to detect expression of the degradation system. The experiment was performed in duplicate using independent biological samples.

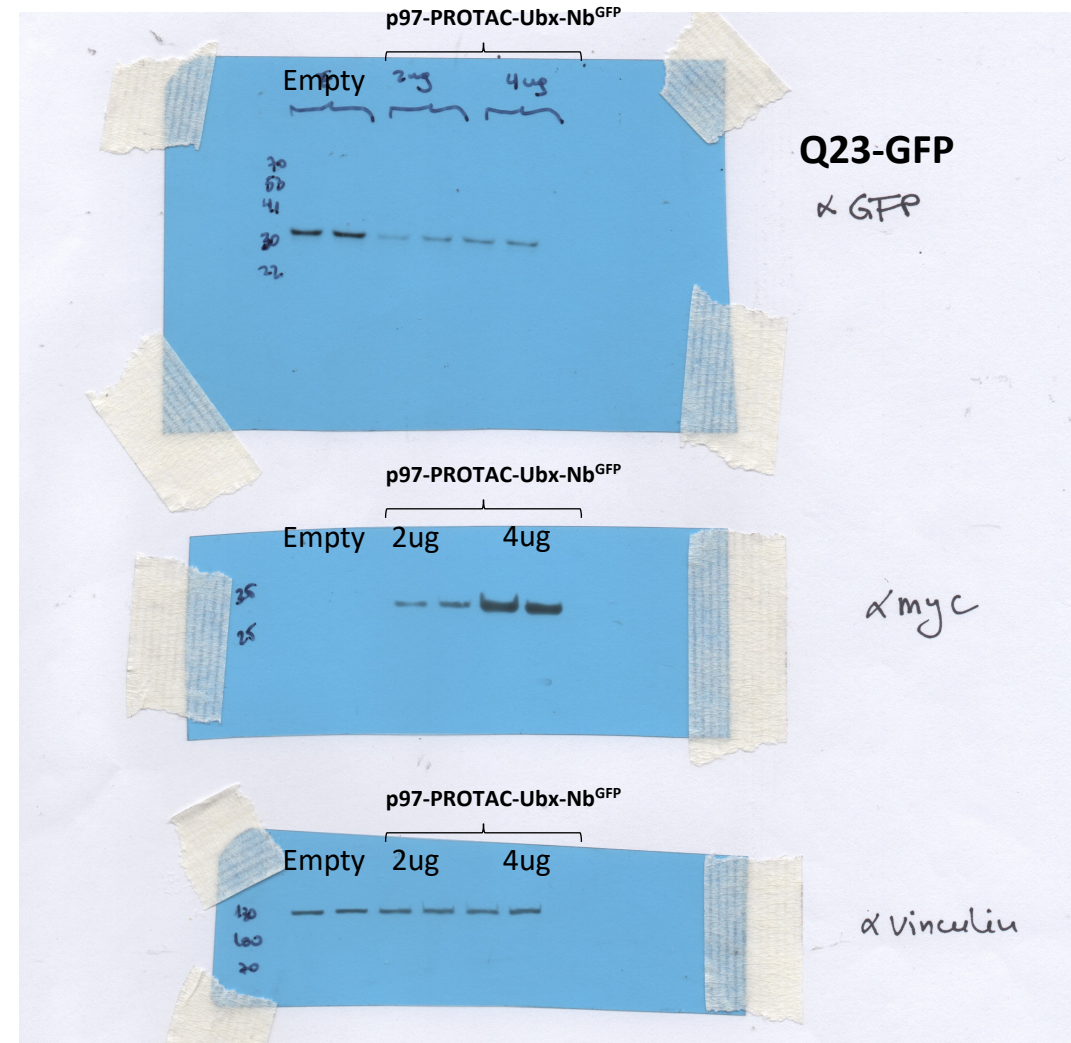

Supplement: supp [file Figure 5A-source data 2.pdf › Figure 5-source data 2/Figure 5A-source data 2.pdf]
