# Supplementary material for: Specific proteolysis mediated by a p97-directed proteolysis-targeting chimera (p97-PROTAC)
Source: eLife journal article supplement (doi:10.7554/elife.101496), 2025-11-25

HeLa cells were co-transfected with **Q74-GFP (0.5  $\mu$ g DNA)** and either an **empty vector (C)** or the **p97-PROTAC-Ubx-Nb<sup>GFP</sup> (U) construct (2 or 4  $\mu$ g DNA)**. Two independent experiments were performed, each conducted in duplicate using independent samples. In both experiments, 20  $\mu$ g of total protein from co-transfected cells were used. In the first experiment, the entire nitrocellulose membrane was initially incubated with **anti-GFP antibody to detect Q74-GFP**. The membrane was then stripped and cut to allow separate incubation with anti-tubulin and anti-Myc antibodies. In the second experiment, the membrane was cut prior to incubation: one portion was incubated with anti-vinculin and the other with anti-GFP..

## Experiment 1

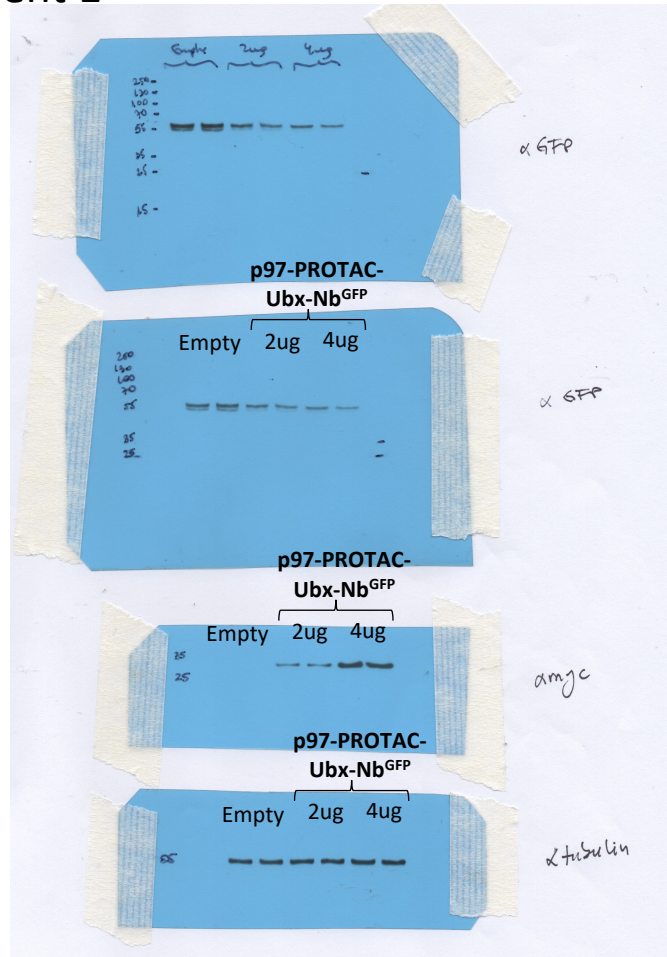

## Experiment 2

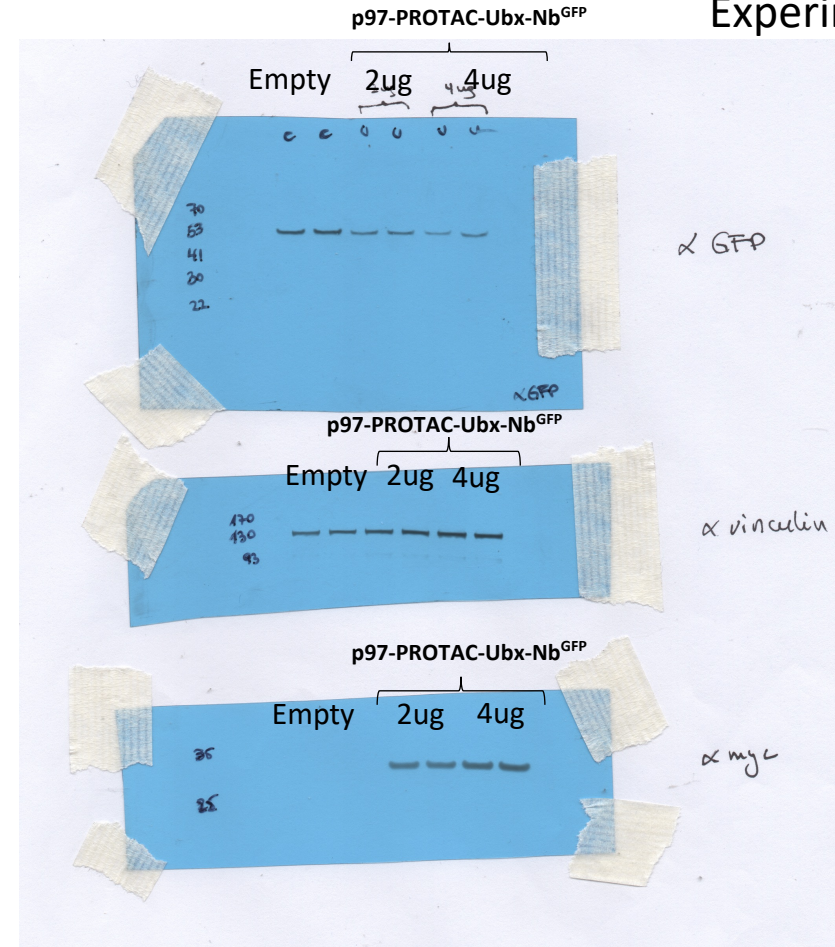

Supplement: supp [file Figure 5D-source data 2.pdf › Figure 5-source data 2/Figure 5D-source data 2.pdf]
