# Supplementary material for: Specific proteolysis mediated by a p97-directed proteolysis-targeting chimera (p97-PROTAC)
Source: eLife journal article supplement (doi:10.7554/elife.101496), 2025-11-25
Supplement: supp [file Figure 6C-source data 2.pdf › Figure 6-source data 2/Figure 6C-source data 2.pdf]

Twenty micrograms of protein extracted from cells co-transfected with **untagged  $\alpha$ -synuclein A53T** (0.5  $\mu$ g DNA) and either an **empty vector (C)** or varying amounts of the **p97-PROTAC-Nb87 construct (U)** were loaded. Two independent experiments were performed, each conducted in duplicate using independent samples.

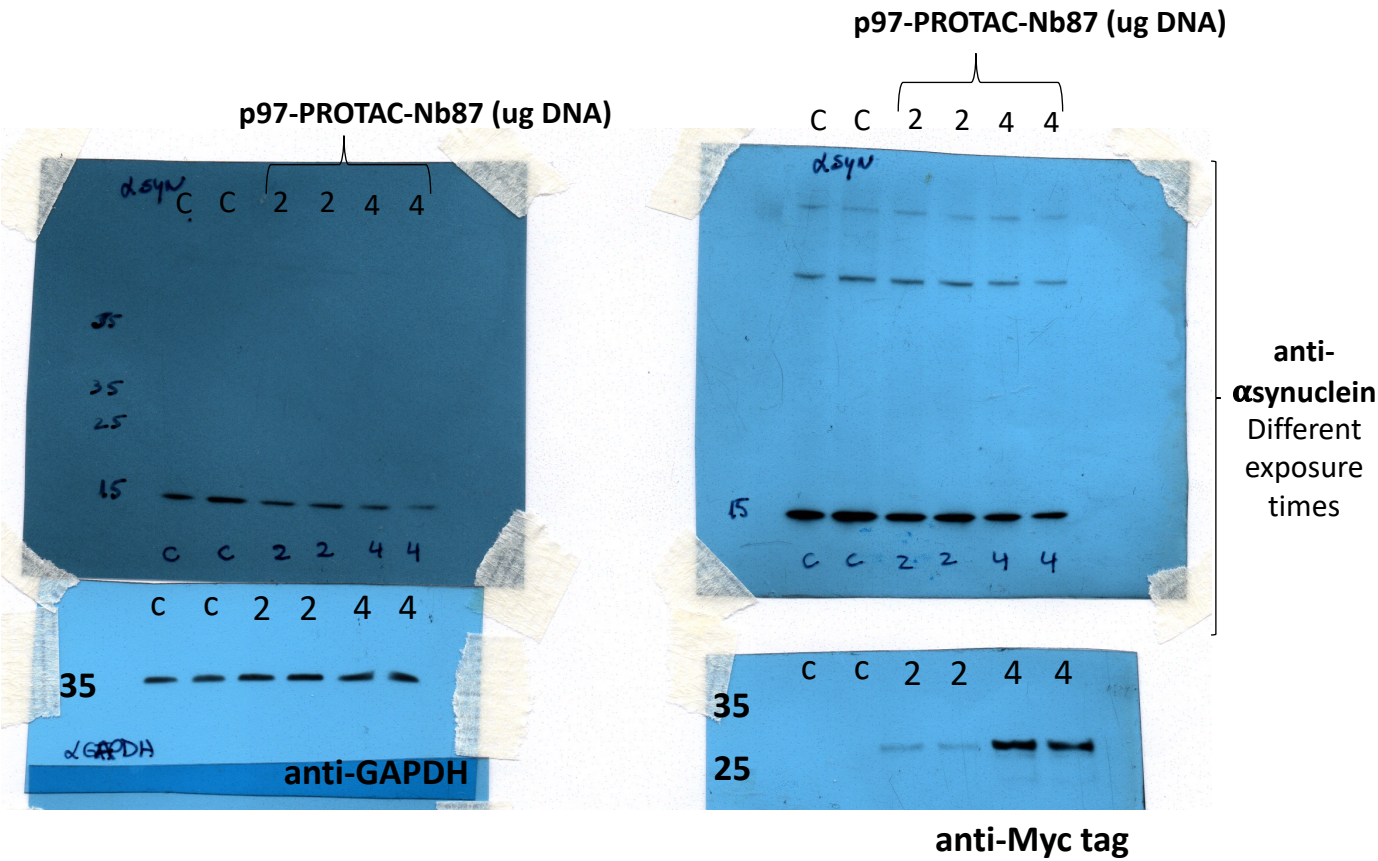

Experiment 1

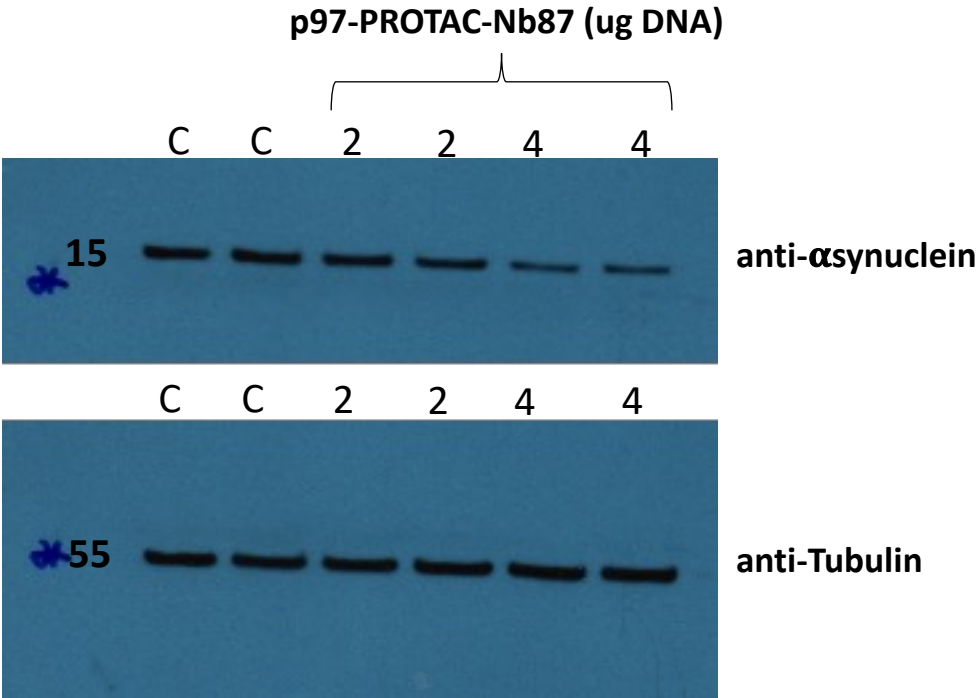

Experiment 2
